# Supplementary material for: Flexible supercapacitor electrode with high performance prepared from graphene oxide films assembled in the presence of p-phenylenediamine and urea
Source: Springer Nature journal article supplement (doi:10.1007/s10854-019-01000-0), 2019-03-21
Supplement: MOESM1 [file 16571600]

**Supporting Information**

**Flexible supercapacitor electrode with high performance prepared from graphene oxide films assembled in the presence of p-phenylenediamine and urea**

Yunzhen Changa, Sisi Xiaa, Gaoyi Hana[[1]](#footnote-1)*, Haihan Zhoua, Dongying Fub, Hua Songc, Yaoming Xiaoa, Ying Zhanga

**Synthesis of graphene oxide( GO).** In a typical process, 1.8 g of graphite powder was added into a mixture of 17 mL of 98 % H2SO4, 3 g K2S2O8, and 3 g of P2O5. The solution was heated to 80 °C and kept stirring for 4.5 h, and the product was obtained by filtering followed by washing with water and drying at 70 °C overnight. For further oxidation treatment, the as-treated graphite was added into 46 mL H2SO4 (98%) and then 1 g of NaNO3 and 6 g of KMnO4 were added into it slowly in turn while keeping the reaction system under stirring and in an ice bath for about 30min. Then the mixture was transfer to 35 °C oil bath and reacted for 2 h followed by diluting with 92 mL of water. Finally, 80 mL of water and 10 mL H2O2 was added into the mixture followed by centrifugation and washing with water. The exfoliation of GO was achieved by sonication.

**
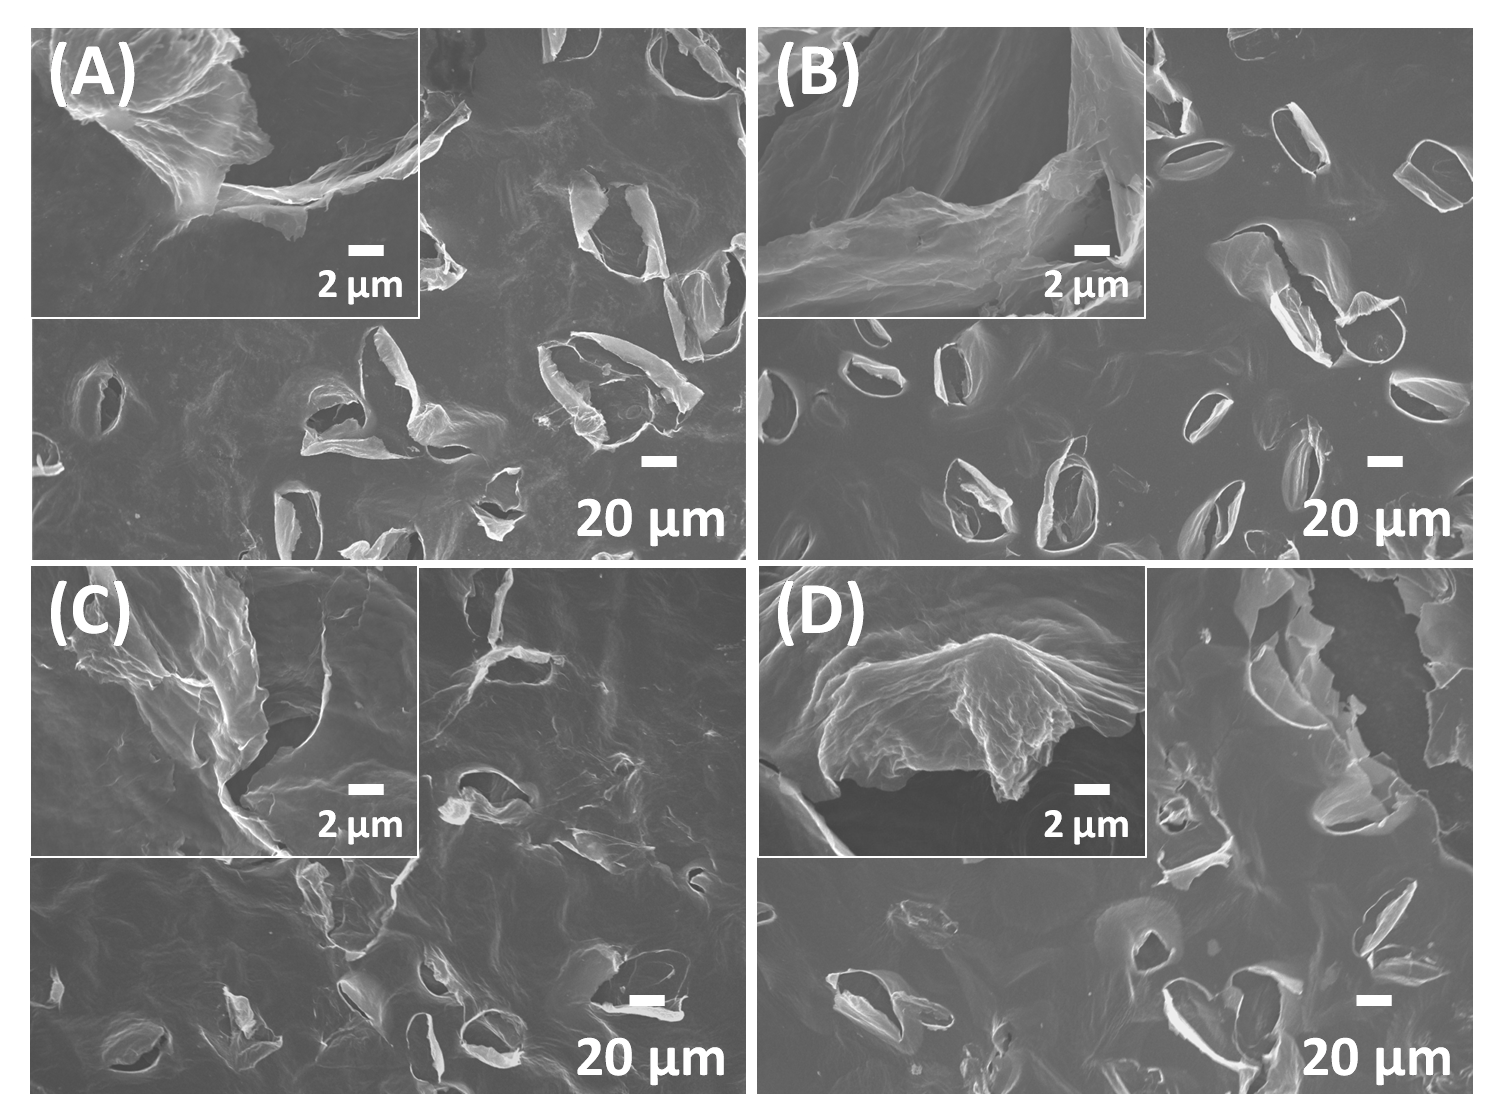
**

**Fig. S1** The SEM images of PUGF-1 (A), PUGF-2 (B), PUGF-3 (C) and PUGF-4 (D).

**
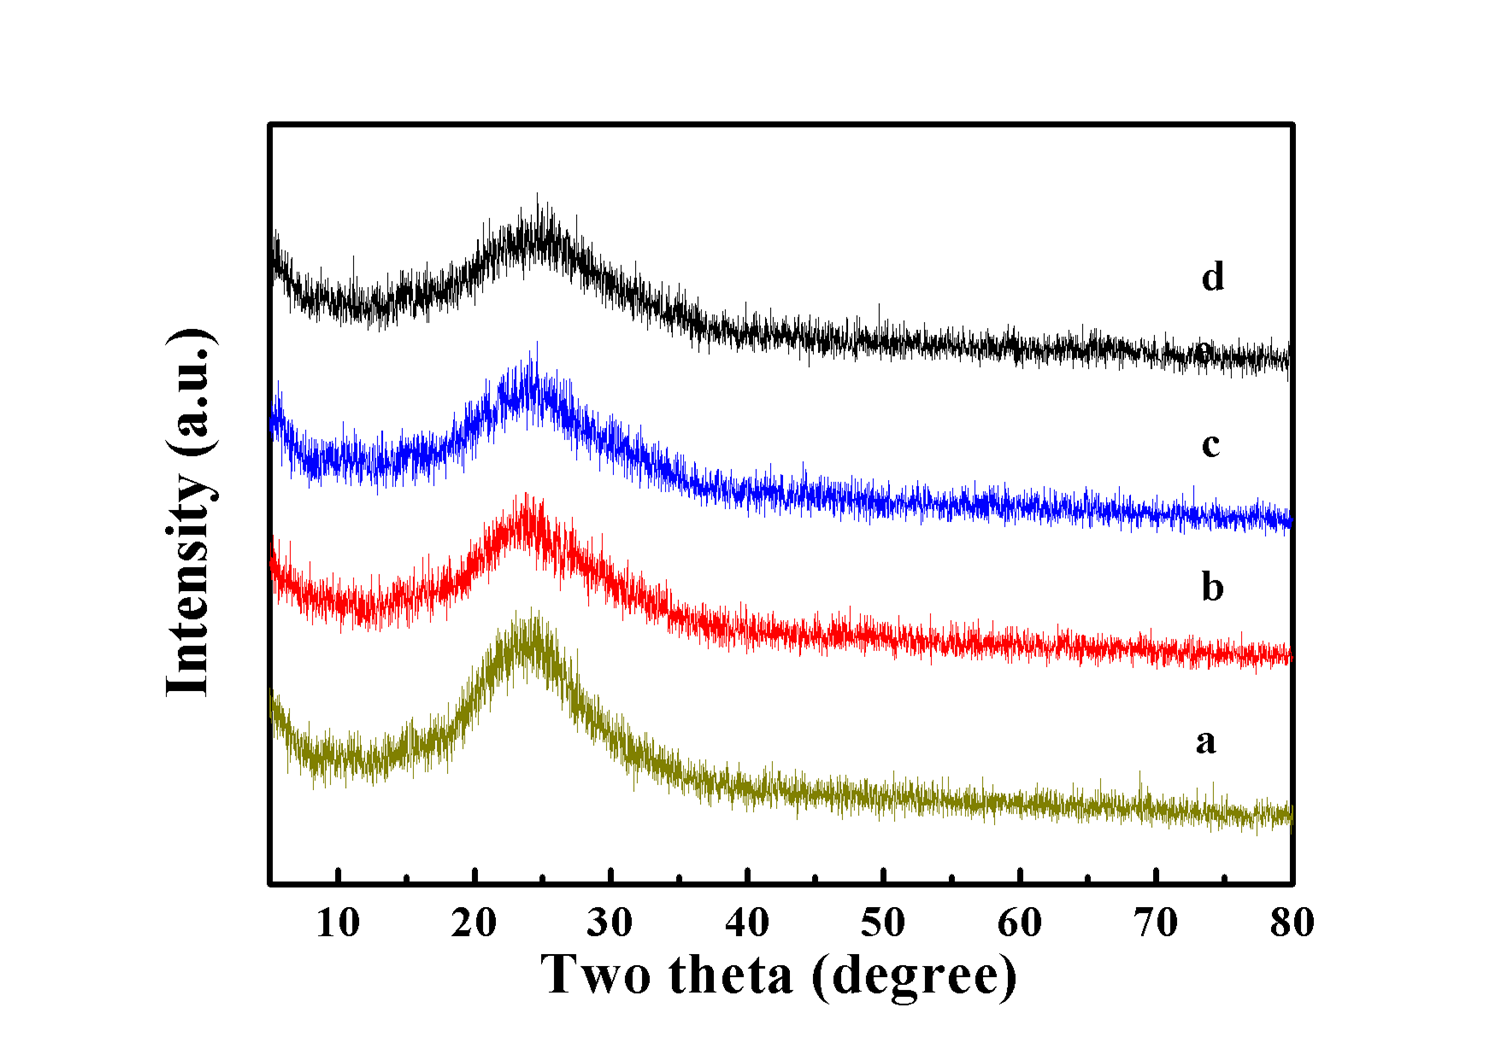
**

**Fig. S2** X-ray diffraction patterns of PUGF-1 (a), PUGF-2 (b), PUGF-3 (c) and PUGF-4 (d).

**

**

**Fig. S3** C1s XPS spectra of GO.

**
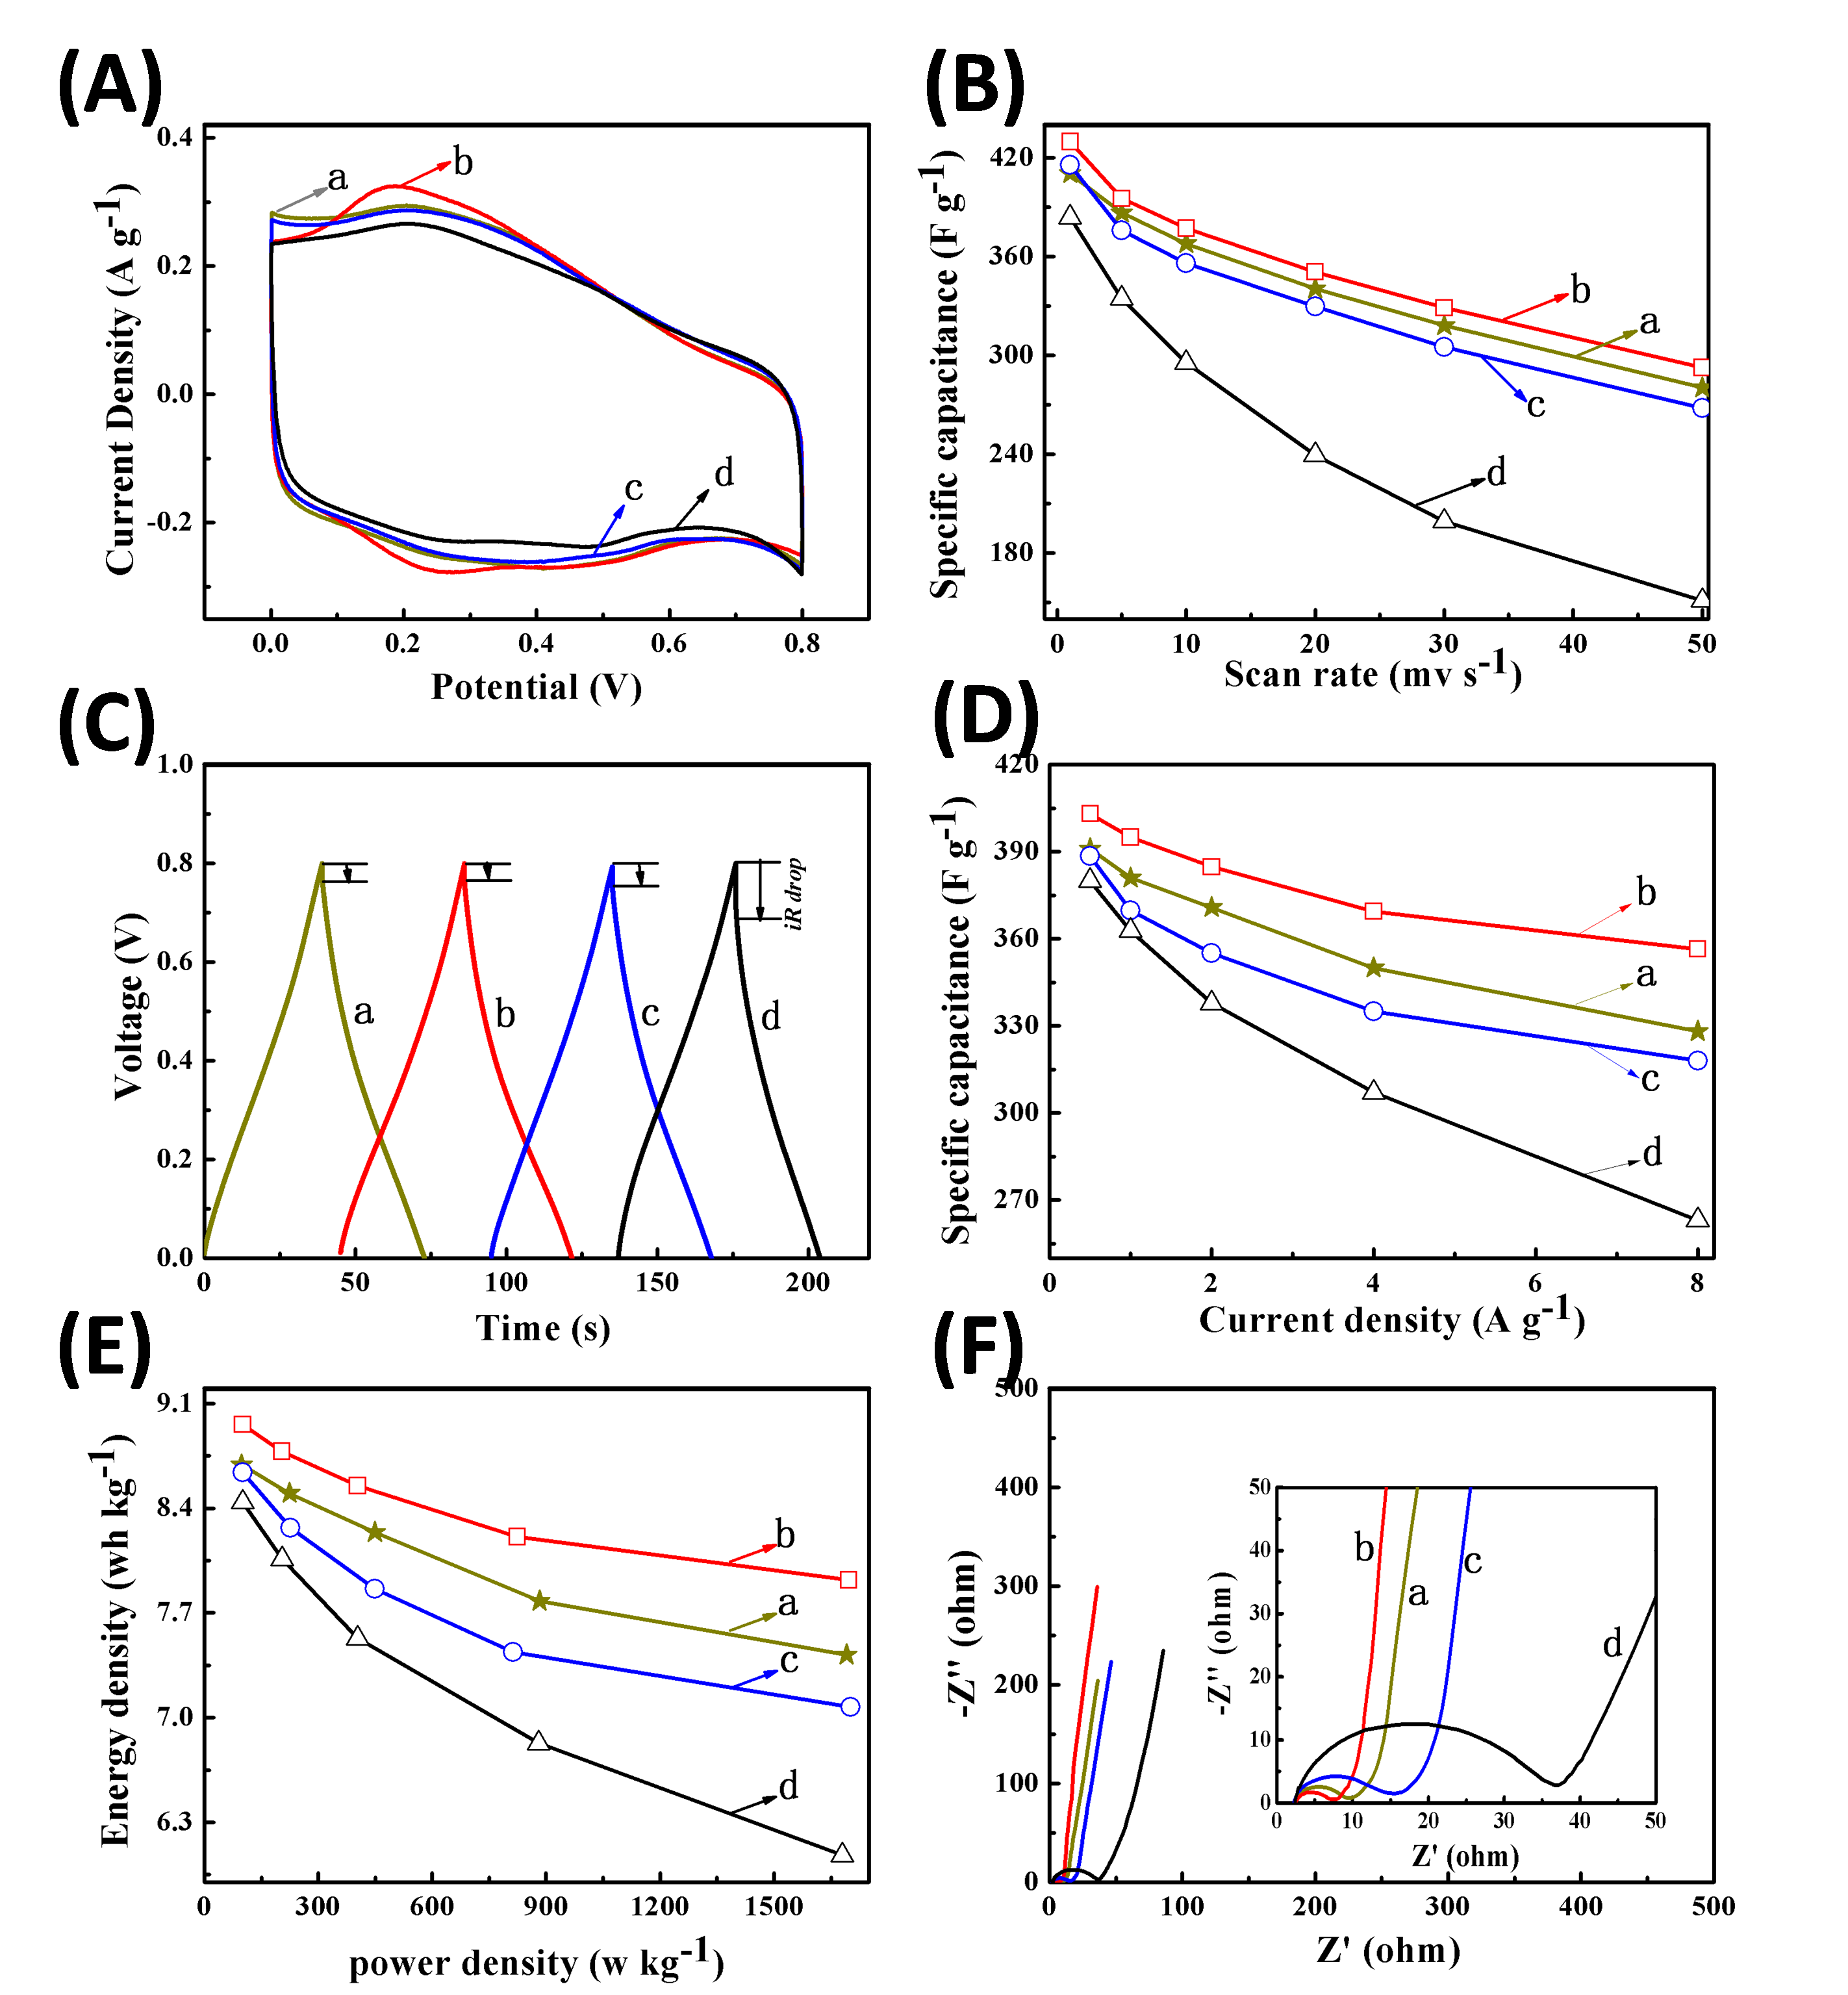
**

**Fig. S4** The CV curves of the cells assembled by PUGF-1 (a), PUGF-2 (b), PUGF-3(c) and PUGF-4(d) at the scan rates of 5 mV s -1 (A); specific capacitance of the films at different scan rates (B); the GCD curves of the films at current density of 4 A g-1 (C); Nyquist plots of films electrodes in 1 M H2SO4 aqueous electrolyte (D); specific capacitance of the films at different current densities (E); the Ragone plots for the films (F).

**
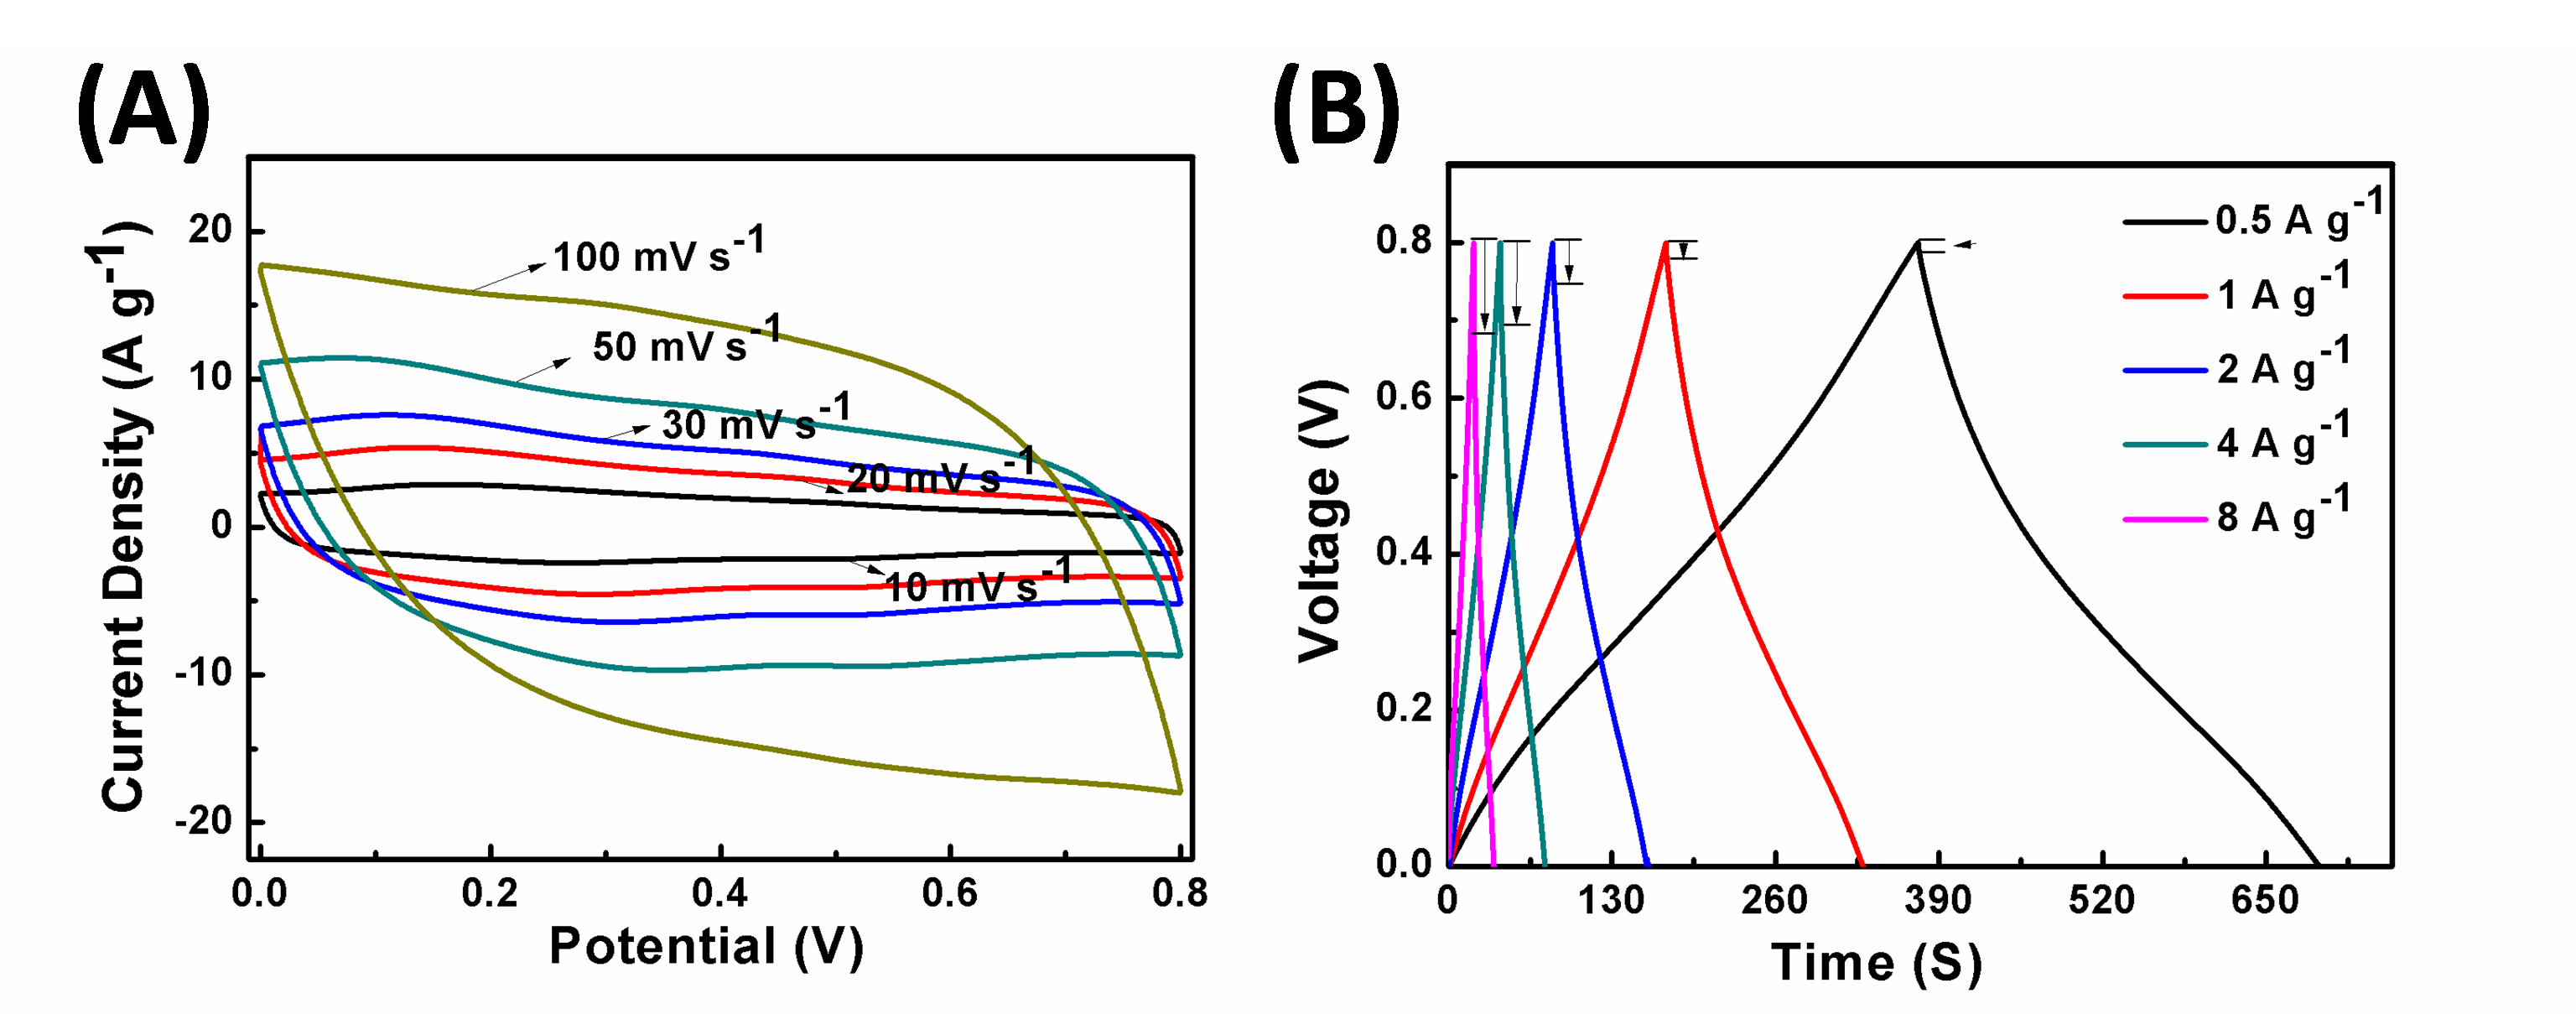
**

**Fig. S5** The CV curves of the cells assembled by PUGF-2 (A); the GCD curves of the PUGF-2 (B).


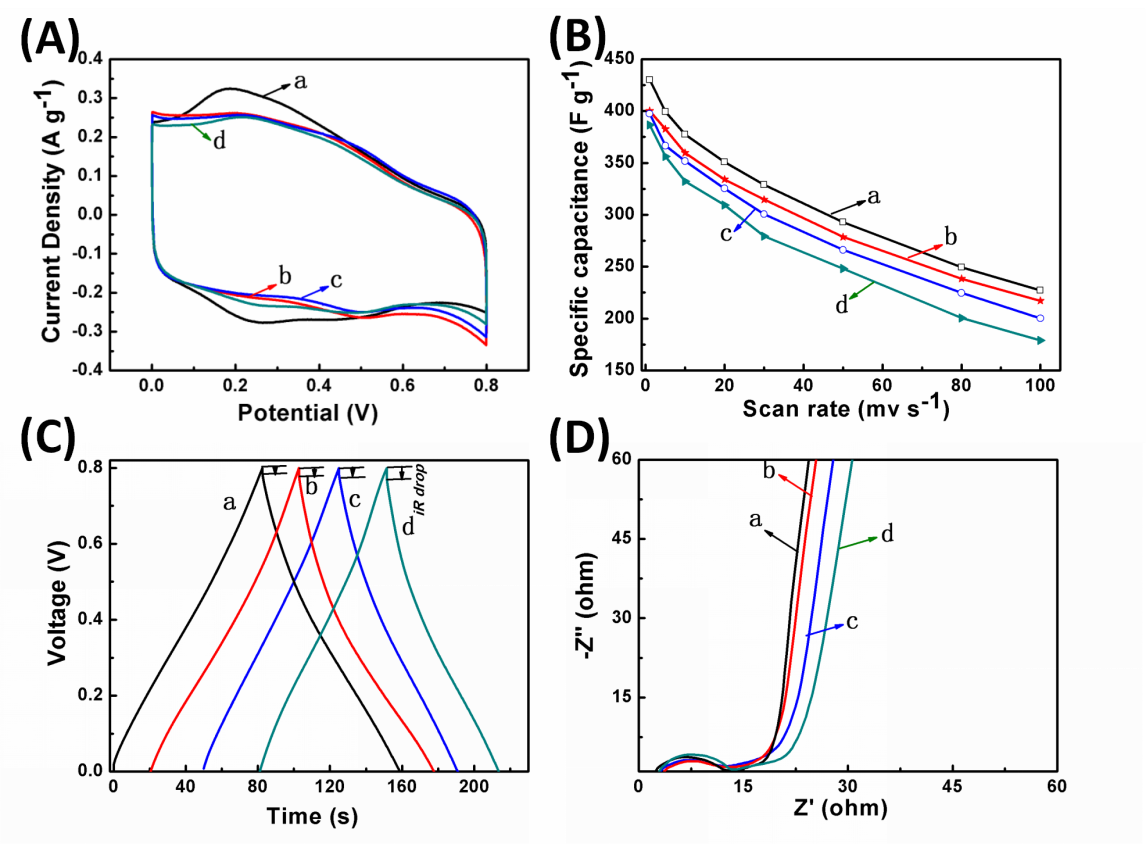


**Fig. S6** The CV curves of the cells assembled by PUGF-2 with different thickness at the scan rates of 20 mV s-1 (A); The plots of the specific capacitance versus the scan rate (B) ; The charge/discharge curves of the cells at 2 A g-1 (C). The EIS of the cells (D). The PUGF-2 with thicknesses of 6 μm (a), 9 μm(b), 12 μm (c), and 18 μm (d)

1. * Corresponding author. Tel: +86-351-7010699. Fax: +86-351-7016358.

   mail address: [han_gaoyis@sxu.edu.cn](mailto:han_gaoyis@sxu.edu.cn) (Gaoyi Han);

   aInstitute of Molecular Science, Key Laboratory of Materials for Energy Conversion and Storage of Shanxi Province, Key Laboratory of Chemical Biology and Molecular Engineering of Education Ministry, Shanxi University, Taiyuan 030006, China

   bInstitute of Crystalline Material, Key Laboratory of Materials for Energy Conversion and Storage of Shanxi Province, Shanxi University, Taiyuan 030006, China

   cSchool of Foreign Languages, Shanxi University, Taiyuan 030006, China [↑](#footnote-ref-1)
